# Supplementary material for: CO2 green technologies in CO2 capture and direct utilization processes: methanation, reverse water-gas shift, and dry reforming of methane
Source: Royal Society of Chemistry journal article supplement (doi:10.1039/d0se00951b), 2020-01-01
Supplement: d0se00951b1.pdf [file d0se00951b1.pdf]

## Appendix A. Supplementary data

**CO<sub>2</sub> green technologies in CO<sub>2</sub> capture and direct utilization process:**

**Methanation, reverse water-gas shift, and dry reforming of methane**

**Seong Bin Jo<sup>a,b,\*</sup>, Jin Hyeok Woo<sup>c,\*</sup>, Jong Heon Lee<sup>c</sup>, Tae Young Kim<sup>c</sup>, Hu In Kang<sup>c</sup>, Soo Chool Lee<sup>b,†</sup>, and Jae Chang Kim<sup>c,†</sup>**

<sup>a</sup> *Department of Chemical and Environmental Engineering, University of California–Riverside, Riverside, California 92521, United States.*

<sup>b</sup> *Research Institute of Advanced Energy Technology, Kyungpook National University, Daegu, 41566, Republic of Korea*

<sup>c</sup> *Department of Chemical Engineering, Kyungpook National University, Daegu, 41566, Republic of Korea*

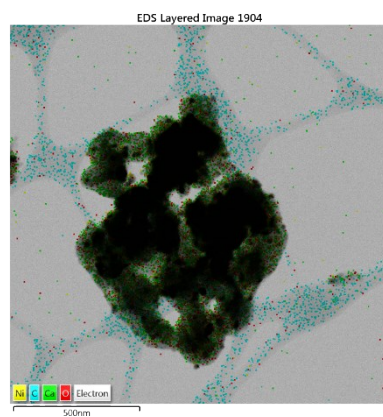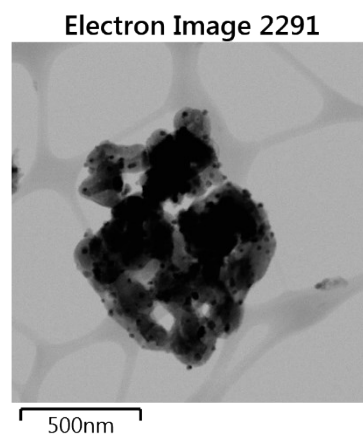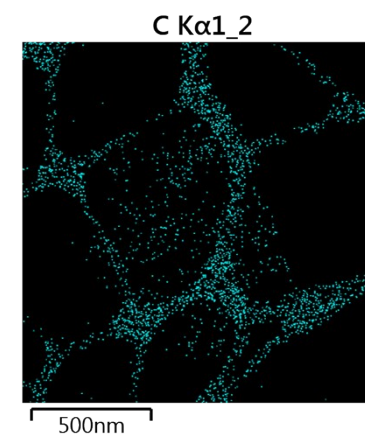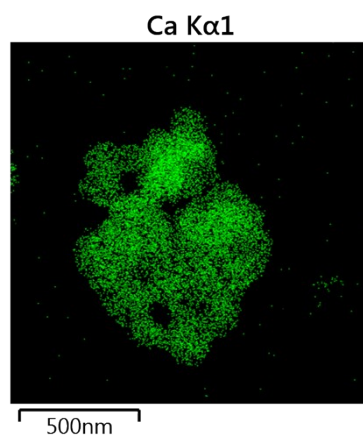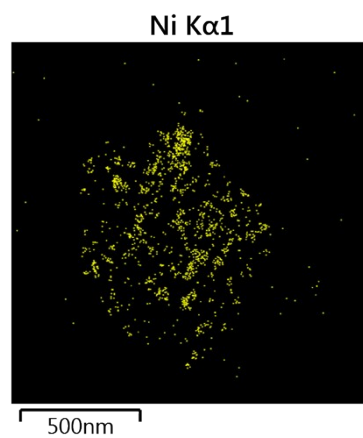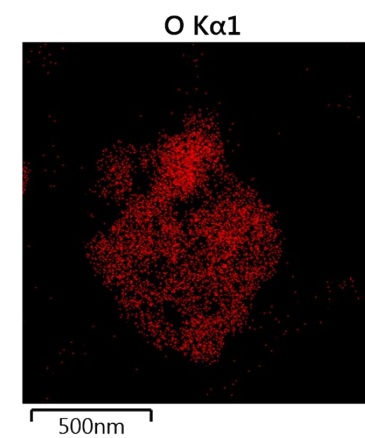

**Fig. S1** TEM-Mapping of the Ni/CaO catal-sorbents

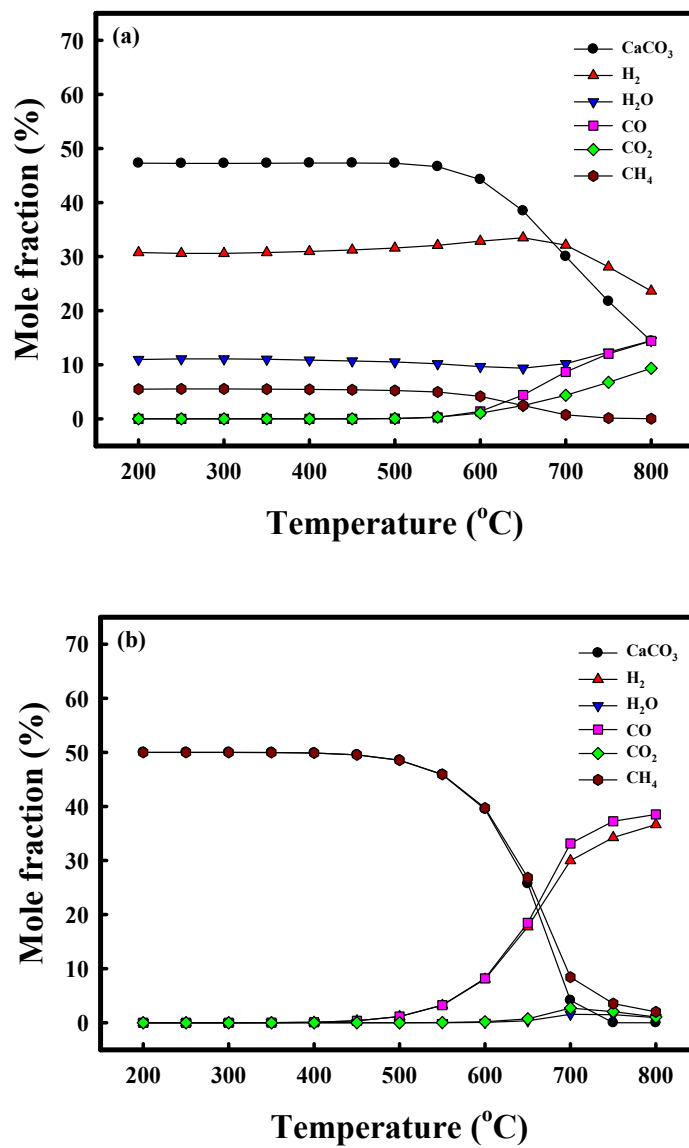

**Fig. S2** Thermodynamics equilibrium mole fraction of CaCO<sub>3</sub> conversion with (a) H<sub>2</sub> (H<sub>2</sub>/CaCO<sub>3</sub> ratio of 1) and (b) CH<sub>4</sub> (CH<sub>4</sub>/CaCO<sub>3</sub> ratio of 1) as a function of reaction temperature.

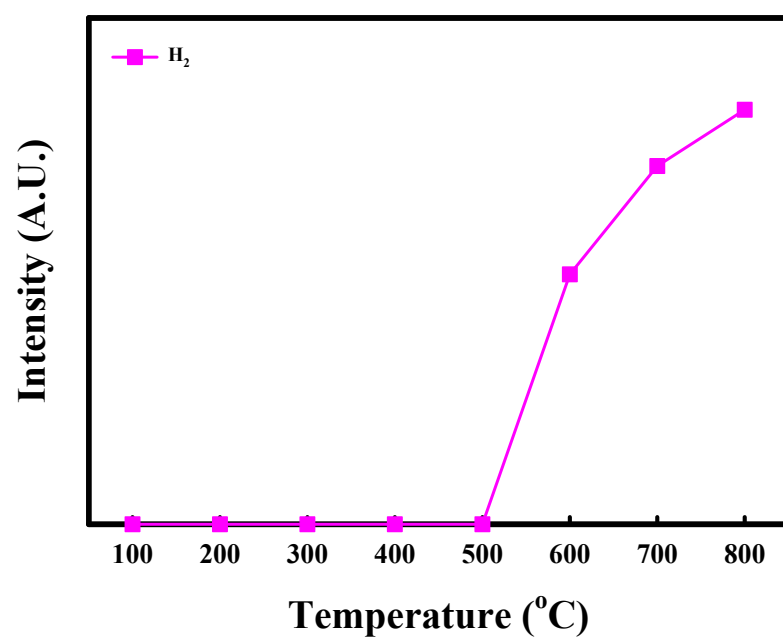

**Fig. S3** TPD result of Ni/CaO catal-sorbent after carbonation under CH<sub>4</sub> conditions from 100 °C to 800 °C.

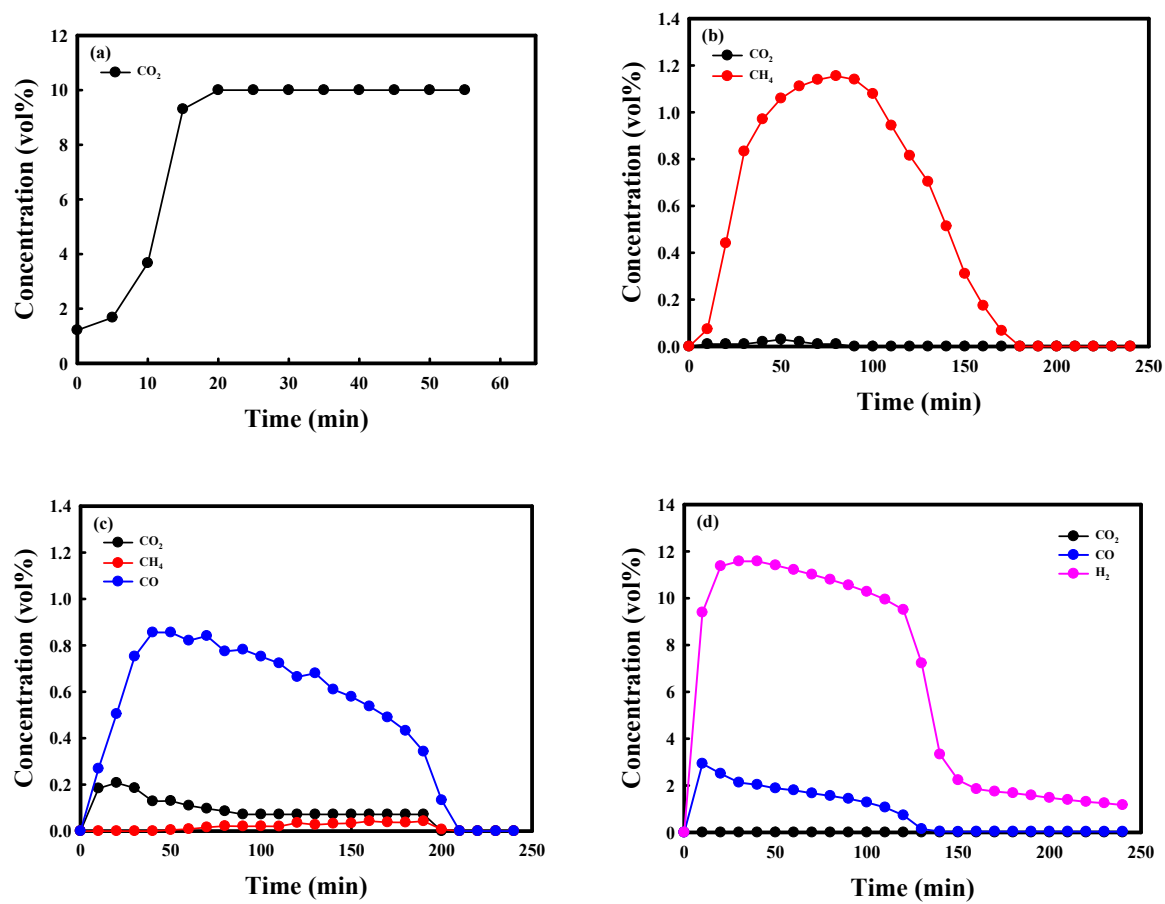

**Fig. S4** CO<sub>2</sub> green technologies in CO<sub>2</sub> capture and direct utilization: (a) CO<sub>2</sub> capture, (b) direct methanation, (c) direct rWGS, and (d) direct DRM over the Ni/CaO catal-sorbent
